# Supplementary material for: Folic acid reduces doxorubicin‐induced cardiomyopathy by modulating endothelial nitric oxide synthase
Source: PubMed Central journal article supplement (PMC5706529; doi:10.1111/jcmm.13231), 2017-06-13
Supplement: JCMM-21-3277-s001.pdf [file JCMM-21-3277-s001.pdf]

## Supplementary data

Folic acid reduces doxorubicin-induced cardiomyopathy by modulating endothelial nitric oxide synthase

Yanti Octavia <sup>a, b, #</sup>, Georgios Kararigas <sup>c, d, #, \*</sup>, Martine de Boer <sup>a</sup>, Ihsan Chrifi <sup>a</sup>, Rinrada Kietadisorn <sup>b</sup>, Melissa Swinnen <sup>e</sup>, Hans Duimel <sup>f</sup>, Fons K Verheyen <sup>f</sup>, Maarten M Brandt <sup>a</sup>, Daniela Fliegner <sup>c</sup>, Caroline Cheng <sup>a</sup>, Stefan Janssens <sup>e</sup>, Dirk J Duncker <sup>a, \$, \*</sup>, An L Moens <sup>a, b, \$</sup>

<sup>a</sup> Division of Experimental Cardiology, Department of Cardiology, Thoraxcenter, Erasmus MC, University Medical Center Rotterdam, Rotterdam, The Netherlands

<sup>b</sup> Department of Cardiology, Cardiovascular Research Institute Maastricht, Maastricht University Medical Centre, Maastricht, The Netherlands

<sup>c</sup> Institute of Gender in Medicine and Center for Cardiovascular Research, Charite University Hospital, Berlin, Germany

<sup>d</sup> DZHK (German Centre for Cardiovascular Research), partner site Berlin, Germany

<sup>e</sup> Department of Cardiovascular Sciences, University of Leuven, Leuven, Belgium

<sup>f</sup> Electron Microscopy Unit, CRISP and Department of Molecular Cell Biology, Maastricht University Medical Centre, Maastricht, The Netherlands

<sup>#</sup> Y.O. and G.K. contributed equally to this paper.

<sup>\$</sup> D.J.D. and A.L.M. contributed equally to this paper.

**\*Corresponding Author** Prof. Georgios Kararigas, Institute of Gender in Medicine & Center for Cardiovascular Research, Charite University Hospital, Hessische Str. 3-4, 10115 Berlin, Germany.

Tel: +49-30-450525355; Fax: +49-30-450525943; Email: [george.kararigas@charite.de](mailto:george.kararigas@charite.de) **or**

Prof. Dirk J Duncker, Division of Experimental Cardiology, Department of Cardiology, Thoraxcenter, Erasmus University Medical Center, PO Box 2040, 3000 CA Rotterdam, The Netherlands. Tel: +31107030866; Fax: +31107044769; Email: [d.duncker@erasmusmc.nl](mailto:d.duncker@erasmusmc.nl)

**Figure S1** Folic acid (FA) effects on doxorubicin (DOXO)-treated HeLa and MDA-MB-231 cells

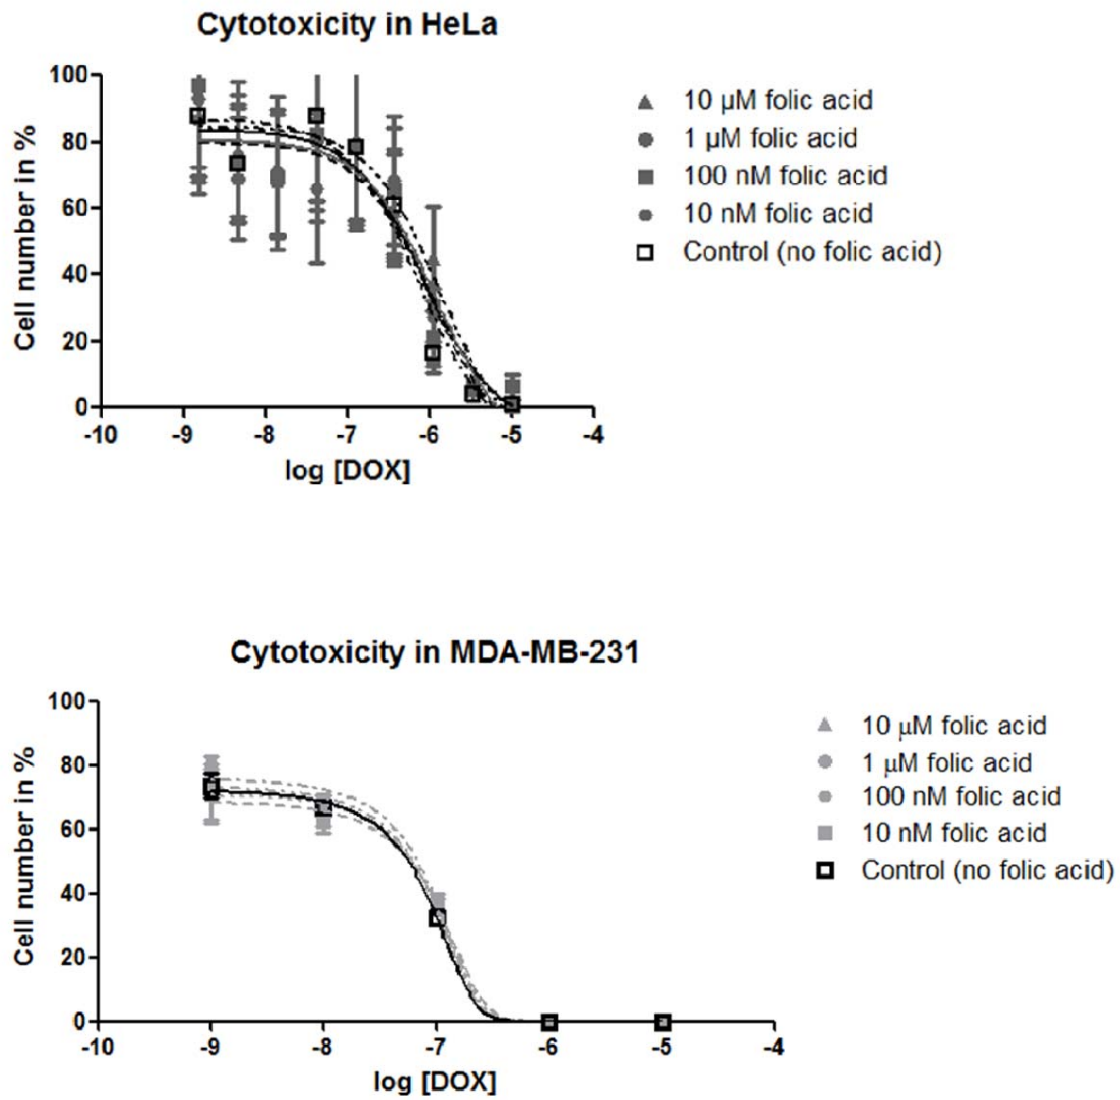

**Figure S2** Neuronal and inducible nitric oxide synthase (nNOS and iNOS, respectively) protein levels normalized to GAPDH and monomer (m):dimer (d)

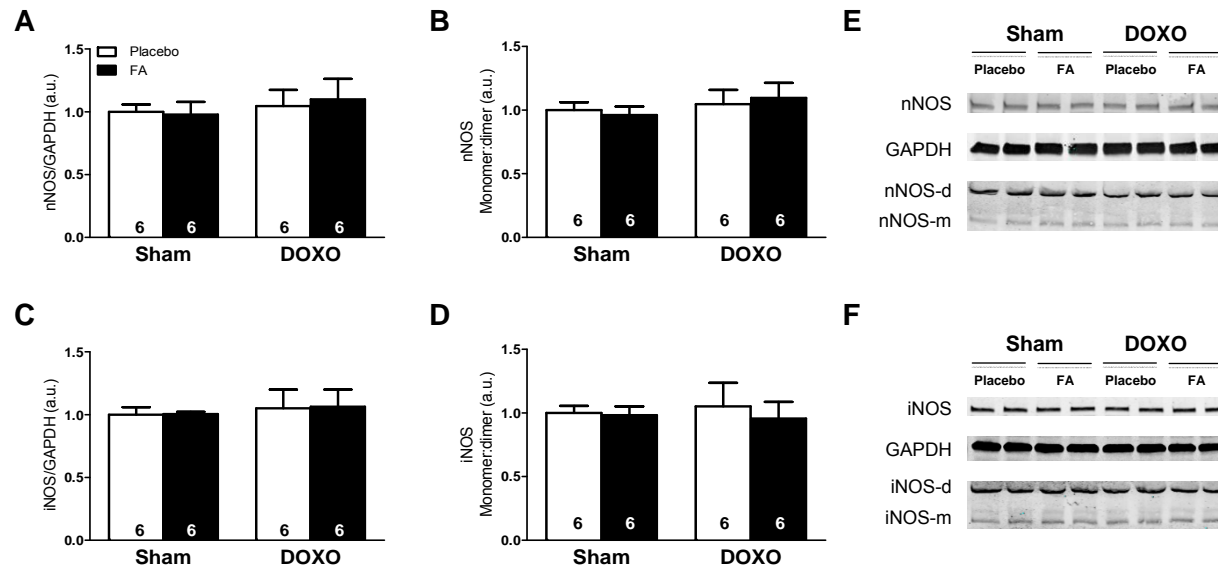

**Table S1** Primer sequences for real-time RT-PCR

| <b>Gene</b>                                                              | <b>Primer sense</b>        | <b>Primer antisense</b> |
|--------------------------------------------------------------------------|----------------------------|-------------------------|
| Metallothionin 2                                                         | CTCGTCGATCTTCAACCGCC       | CGGAAGCCTCTTTGCAGATG    |
| Lipocalin 2                                                              | CCAGCCACCATACCAAGGAG       | GACGCCATTGGTGGTGTTAAG   |
| Serine (or cysteine) peptidase inhibitor, clade A, member 3N (Serpina3n) | TCTTCTCCACACAGGCTGAC       | CAGAGGGTACAGTTTCGCAGA   |
| $\alpha$ -skeletal actin                                                 | TGACGTGTACATAGATTGACTCGTTT | TGGCTGGCTTTAATGCTTCA    |
| Atrial natriuretic peptide                                               | TTCCTCGTCTTGGCCTTTTG       | CCTCATCTTCTACCGGCATCTTC |
| Brain natriuretic peptide                                                | GGGAGAACACGGCATCATTG       | ACAGCACCTTCAGGAGATCCA   |

**Table S2** Anatomical data

|                                |         | Sham        | Doxorubicin |    |
|--------------------------------|---------|-------------|-------------|----|
| Body weight baseline (g)       | Placebo | 26.8 ± 0.6  | 26.6 ± 0.3  |    |
|                                | FA      | 27.1 ± 0.3  | 27.7 ± 0.4  |    |
| Body weight follow up (g)      | Placebo | 27.6 ± 0.4  | 22.1 ± 0.5  | *  |
|                                | FA      | 27.0 ± 0.5  | 22.5 ± 0.5  | *  |
| Tibia length (cm)              | Placebo | 1.80 ± 0.01 | 1.78 ± 0.01 | *  |
|                                | FA      | 1.79 ± 0.01 | 1.78 ± 0.01 |    |
| LV weight (mg)                 | Placebo | 95.5 ± 1.7  | 65.7 ± 2.0  | *  |
|                                | FA      | 91.4 ± 2.3  | 74.5 ± 3.8  | *† |
| RV weight (mg)                 | Placebo | 25.0 ± 0.7  | 17.9 ± 0.9  | *  |
|                                | FA      | 25.6 ± 1.0  | 20.2 ± 1.2  | *  |
| LV weight/tibia length (mg/cm) | Placebo | 53.1 ± 1.0  | 37.4 ± 1.1  | *  |
|                                | FA      | 51.0 ± 1.3  | 42.5 ± 1.7  | *† |
| LVIDd (mm)                     | Placebo | 3.35 ± 0.06 | 2.66 ± 0.25 | *  |
|                                | FA      | 3.31 ± 0.09 | 3.31 ± 0.15 | †  |
| LVIDs (mm)                     | Placebo | 1.79 ± 0.07 | 1.10 ± 0.17 | *  |
|                                | FA      | 1.83 ± 0.09 | 1.71 ± 0.15 | †  |
| Stroke volume (µl)             | Placebo | 36.1 ± 1.4  | 24.2 ± 4.6  | *  |
|                                | FA      | 34.4 ± 2.1  | 36.0 ± 3.2  | †  |
| LVPWd (mm)                     | Placebo | 0.96 ± 0.02 | 1.00 ± 0.17 |    |
|                                | FA      | 0.94 ± 0.04 | 0.88 ± 0.02 |    |

Data are presented as mean ± SEM. LV, left ventricle; RV, right ventricle; LVIDd, LV internal dimensions at end-diastole; LVIDs, LVID at end-systole; LVPWd, LV posterior wall at end diastole.

\* $P < 0.05$  vs. Sham; † $P < 0.05$  vs. DOXO

**Table S3** Doxorubicin-regulated probe sets

| Affymetrix ID | Gene symbol | Gene name                                       | <i>P</i> value | Fold change relative to DOXO |
|---------------|-------------|-------------------------------------------------|----------------|------------------------------|
| 10566258      |             |                                                 | 0              | 0.06                         |
| 10598032      |             |                                                 | 0              | 0.16                         |
| 10593058      |             |                                                 | 0              | 1.56                         |
| 10566254      | Hbb-b1      | hemoglobin, beta adult major chain              | 0              | 0.38                         |
| 10574023      | Mt2         | metallothionein 2                               | 0              | 10.13                        |
| 10342598      |             |                                                 | 0              | 1.57                         |
| 10598053      |             |                                                 | 0              | 0.31                         |
| 10342849      |             |                                                 | 0              | 1.40                         |
| 10604877      | Mir465      | microRNA 465                                    | 0              | 1.37                         |
| 10342788      |             |                                                 | 0.001          | 1.41                         |
| 10341762      |             |                                                 | 0.001          | 1.45                         |
| 10338956      |             |                                                 | 0.001          | 1.55                         |
| 10342109      |             |                                                 | 0.001          | 0.56                         |
| 10444298      | H2-Eb1      | histocompatibility 2, class II antigen E beta   | 0.001          | 0.62                         |
| 10493831      | S100a8      | S100 calcium binding protein A8 (calgranulin A) | 0.001          | 2.11                         |
| 10602372      | Alas2       | aminolevulinic acid synthase 2, erythroid       | 0.001          | 0.69                         |
| 10375058      | Hba-a2      | hemoglobin alpha, adult chain 2                 | 0.001          | 0.20                         |
| 10444229      | H2-DMa      | histocompatibility 2, class II, locus DMa       | 0.001          | 0.75                         |
| 10384670      |             |                                                 | 0.001          | 1.25                         |
| 10531407      | Cxcl9       | chemokine (C-X-C motif) ligand 9                | 0.001          | 0.56                         |
| 10341476      |             |                                                 | 0.001          | 1.48                         |
| 10580850      |             |                                                 | 0.001          | 1.38                         |
| 10375051      | Hba-a1      | hemoglobin alpha, adult chain 1                 | 0.001          | 0.17                         |
| 10563895      |             |                                                 | 0.002          | 1.26                         |
| 10582080      |             |                                                 | 0.002          | 1.22                         |
| 10435497      | Stfa211     | stefin A2 like 1                                | 0.002          | 1.97                         |
| 10420804      | Prss55      | protease, serine, 55                            | 0.002          | 0.69                         |
| 10356510      | lqca        | IQ motif containing with AAA domain             | 0.002          | 1.42                         |
| 10338194      |             |                                                 | 0.002          | 1.72                         |
| 10515416      | Rps8        | ribosomal protein S8                            | 0.002          | 1.34                         |

| Affymetrix ID | Gene symbol   | Gene name                                             | P value | Fold change relative to DOXO |
|---------------|---------------|-------------------------------------------------------|---------|------------------------------|
| 10542164      | Clec12a       | C-type lectin domain family 12, member a              | 0.002   | 0.66                         |
| 10416923      |               |                                                       | 0.003   | 1.75                         |
| 10338145      |               |                                                       | 0.003   | 0.73                         |
| 10343850      |               |                                                       | 0.003   | 0.76                         |
| 10444291      | H2-Ab1        | histocompatibility 2, class II antigen A, beta 1      | 0.003   | 0.44                         |
| 10589535      | Ngp           | neutrophilic granule protein                          | 0.003   | 2.00                         |
| 10563597      | Saa3          | serum amyloid A 3                                     | 0.003   | 1.83                         |
| 10554032      |               |                                                       | 0.003   | 1.26                         |
| 10338338      |               |                                                       | 0.004   | 1.34                         |
| 10338345      |               |                                                       | 0.004   | 0.70                         |
| 10450154      | H2-Aa         | histocompatibility 2, class II antigen A, alpha       | 0.004   | 0.34                         |
| 10576437      |               |                                                       | 0.004   | 1.24                         |
| 10455866      | 1700011I03Rik | RIKEN cDNA 1700011I03 gene                            | 0.004   | 1.53                         |
| 10343366      |               |                                                       | 0.004   | 1.49                         |
| 10343068      |               |                                                       | 0.004   | 0.71                         |
| 10379953      | 4632419I22Rik | RIKEN cDNA 4632419I22 gene                            | 0.004   | 0.82                         |
| 10339075      |               |                                                       | 0.004   | 0.72                         |
| 10481627      | Lcn2          | lipocalin 2                                           | 0.004   | 4.92                         |
| 10513818      | Stmn1         | stathmin 1                                            | 0.004   | 0.77                         |
| 10453057      | Cyp1b1        | cytochrome P450, family 1, subfamily b, polypeptide 1 | 0.005   | 1.40                         |
| 10433885      | Cebpd         | CCAAT/enhancer binding protein (C/EBP), delta         | 0.005   | 1.46                         |
| 10343183      |               |                                                       | 0.005   | 0.79                         |
| 10473444      | Aplnr         | apelin receptor                                       | 0.005   | 0.58                         |
| 10342689      |               |                                                       | 0.005   | 0.70                         |
| 10343682      |               |                                                       | 0.005   | 1.31                         |
| 10343863      |               |                                                       | 0.005   | 1.42                         |
| 10458046      | D0H4S114      | DNA segment, human D4S114                             | 0.005   | 0.54                         |
| 10523128      | Ppbp          | pro-platelet basic protein                            | 0.005   | 0.72                         |
| 10502335      | Bank1         | B-cell scaffold protein with ankyrin repeats 1        | 0.005   | 0.77                         |
| 10342020      |               |                                                       | 0.005   | 1.78                         |
| 10341461      |               |                                                       | 0.006   | 0.71                         |
| 10555736      | Olf558        | olfactory receptor 558                                | 0.006   | 0.73                         |

| Affymetrix ID | Gene symbol | Gene name                                                                      | P value | Fold change relative to DOXO |
|---------------|-------------|--------------------------------------------------------------------------------|---------|------------------------------|
| 10453688      |             |                                                                                | 0.006   | 1.73                         |
| 10398075      | Serpina3n   | serine (or cysteine) peptidase inhibitor, clade A, member 3N                   | 0.006   | 4.41                         |
| 10419934      | Myh7        | myosin, heavy polypeptide 7, cardiac muscle, beta                              | 0.006   | 4.56                         |
| 10342455      |             |                                                                                | 0.006   | 0.74                         |
| 10401320      | Adam4       | a disintegrin and metallopeptidase domain 4                                    | 0.006   | 0.76                         |
| 10492798      | Sfrp2       | secreted frizzled-related protein 2                                            | 0.006   | 0.83                         |
| 10404132      | Cmah        | cytidine monophospho-N-acetylneuraminic acid hydroxylase                       | 0.006   | 0.82                         |
| 10434689      | Ahsg        | alpha-2-HS-glycoprotein                                                        | 0.006   | 1.47                         |
| 10349832      | Gm7246      | predicted gene 7246                                                            | 0.006   | 1.58                         |
| 10549635      | Lilra5      | leukocyte immunoglobulin-like receptor, subfamily A (with TM domain), member 5 | 0.006   | 0.83                         |
| 10341250      |             |                                                                                | 0.006   | 0.72                         |
| 10375608      | Scgb3a1     | secretoglobin, family 3A, member 1                                             | 0.006   | 1.54                         |
| 10375559      |             |                                                                                | 0.006   | 1.48                         |
| 10385507      | Gm12185     | predicted gene 12185                                                           | 0.006   | 0.84                         |
| 10352125      |             |                                                                                | 0.006   | 0.80                         |
| 10340250      |             |                                                                                | 0.006   | 1.28                         |
| 10342135      |             |                                                                                | 0.007   | 1.34                         |
| 10338699      |             |                                                                                | 0.007   | 1.57                         |
| 10340559      |             |                                                                                | 0.007   | 1.38                         |
| 10421970      |             |                                                                                | 0.007   | 0.71                         |
| 10359888      |             |                                                                                | 0.007   | 1.27                         |
| 10572083      |             |                                                                                | 0.007   | 1.24                         |
| 10595145      | Gm8074      | predicted gene 8074                                                            | 0.007   | 1.36                         |
| 10466130      | Ms4a8a      | membrane-spanning 4-domains, subfamily A, member 8A                            | 0.007   | 1.33                         |
| 10340886      |             |                                                                                | 0.008   | 0.73                         |
| 10462912      | Lgi1        | leucine-rich repeat LGI family, member 1                                       | 0.008   | 0.57                         |
| 10439296      | Stfa2       | stefin A2                                                                      | 0.008   | 1.58                         |
| 10338788      |             |                                                                                | 0.008   | 0.73                         |
| 10342778      |             |                                                                                | 0.008   | 1.34                         |
| 10593191      |             |                                                                                | 0.008   | 1.33                         |
| 10403076      |             |                                                                                | 0.008   | 1.31                         |
| 10498350      | P2ry14      | purinergic receptor P2Y, G-protein coupled, 14                                 | 0.008   | 0.77                         |



| Affymetrix ID | Gene symbol   | Gene name                                                                | P value | Fold change relative to DOXO |
|---------------|---------------|--------------------------------------------------------------------------|---------|------------------------------|
| 10523359      | Cxcl13        | chemokine (C-X-C motif) ligand 13                                        | 0.008   | 1.87                         |
| 10338917      |               |                                                                          | 0.008   | 0.76                         |
| 10561787      | Zfp27         | zinc finger protein 27                                                   | 0.009   | 0.83                         |
| 10407387      | Gm7120        | predicted gene 7120                                                      | 0.009   | 0.76                         |
| 10339214      |               |                                                                          | 0.009   | 1.34                         |
| 10425283      | Maff          | v-maf musculoaponeurotic fibrosarcoma oncogene family, protein F (avian) | 0.009   | 1.34                         |
| 10360418      | Rgs7          | regulator of G protein signaling 7                                       | 0.009   | 0.84                         |
| 10342873      |               |                                                                          | 0.009   | 0.66                         |
| 10368268      |               |                                                                          | 0.009   | 1.21                         |
| 10439009      | Apod          | apolipoprotein D                                                         | 0.009   | 2.33                         |
| 10340050      |               |                                                                          | 0.009   | 1.36                         |
| 10343410      |               |                                                                          | 0.009   | 1.42                         |
| 10512377      | Ccl21a        | chemokine (C-C motif) ligand 21A (serine)                                | 0.009   | 0.62                         |
| 10408926      |               |                                                                          | 0.009   | 1.20                         |
| 10338444      |               |                                                                          | 0.01    | 1.59                         |
| 10338101      |               |                                                                          | 0.01    | 0.76                         |
| 10342313      |               |                                                                          | 0.01    | 0.75                         |
| 10595148      | Gsta2         | glutathione S-transferase, alpha 2 (Yc2)                                 | 0.01    | 1.92                         |
| 10476321      | Prnd          | prion protein dublet                                                     | 0.01    | 0.68                         |
| 10499189      | Fcrls         | Fc receptor-like S, scavenger receptor                                   | 0.01    | 0.77                         |
| 10448350      | Paqr4         | progesterin and adipoQ receptor family member IV                         | 0.01    | 0.81                         |
| 10412481      | 2410127L17Rik | RIKEN cDNA 2410127L17 gene                                               | 0.01    | 0.78                         |
| 10483000      | Itgb6         | integrin beta 6                                                          | 0.01    | 0.61                         |
| 10341946      |               |                                                                          | 0.011   | 1.37                         |
| 10528909      |               |                                                                          | 0.011   | 1.23                         |
| 10342440      |               |                                                                          | 0.011   | 1.47                         |
| 10601581      | Trim12c       | tripartite motif-containing 12C                                          | 0.011   | 0.80                         |
| 10342948      |               |                                                                          | 0.011   | 0.74                         |
| 10476569      | 2310003L22Rik | RIKEN cDNA 2310003L22 gene                                               | 0.011   | 0.83                         |
| 10423599      | Matn2         | matrilin 2                                                               | 0.011   | 0.85                         |
| 10340928      |               |                                                                          | 0.011   | 1.29                         |
| 10356880      | St8sia4       | ST8 alpha-N-acetyl-neuraminide alpha-2,8-sialyltransferase 4             | 0.011   | 0.76                         |

| Affymetrix ID | Gene symbol   | Gene name                                     | P value | Fold change relative to DOXO |
|---------------|---------------|-----------------------------------------------|---------|------------------------------|
| 10414175      |               |                                               | 0.012   | 1.31                         |
| 10541614      | Clec4d        | C-type lectin domain family 4, member d       | 0.012   | 1.37                         |
| 10340650      |               |                                               | 0.012   | 0.62                         |
| 10598976      | Timp1         | tissue inhibitor of metalloproteinase 1       | 0.012   | 1.88                         |
| 10359908      | Rgs4          | regulator of G-protein signaling 4            | 0.012   | 0.81                         |
| 10357472      | Cxcr4         | chemokine (C-X-C motif) receptor 4            | 0.012   | 0.84                         |
| 10417561      | Fam107a       | family with sequence similarity 107, member A | 0.012   | 1.32                         |
| 10494388      | Hist2h2be     | histone cluster 2, H2be                       | 0.012   | 0.86                         |
| 10422005      |               |                                               | 0.012   | 1.20                         |
| 10342597      |               |                                               | 0.012   | 0.78                         |
| 10342810      |               |                                               | 0.012   | 0.73                         |
| 10354416      |               |                                               | 0.012   | 1.39                         |
| 10339536      |               |                                               | 0.012   | 0.82                         |
| 10458870      |               |                                               | 0.012   | 1.18                         |
| 10436100      | Retnlg        | resistin like gamma                           | 0.013   | 1.64                         |
| 10339668      |               |                                               | 0.013   | 0.79                         |
| 10339331      |               |                                               | 0.013   | 0.77                         |
| 10443463      | Cdkn1a        | cyclin-dependent kinase inhibitor 1A (P21)    | 0.013   | 2.93                         |
| 10339921      |               |                                               | 0.013   | 0.75                         |
| 10399751      | Colec11       | collectin sub-family member 11                | 0.014   | 0.84                         |
| 10441794      | Mrgprh        | MAS-related GPR, member H                     | 0.014   | 0.71                         |
| 10408329      |               |                                               | 0.014   | 0.66                         |
| 10417212      | Itgbl1        | integrin, beta-like 1                         | 0.014   | 0.84                         |
| 10362115      | 1110021L09Rik | RIKEN cDNA 1110021L09 gene                    | 0.014   | 0.83                         |
| 10342360      |               |                                               | 0.014   | 0.84                         |
| 10342631      |               |                                               | 0.014   | 0.77                         |

**Table S4** Folic acid (FA) effects on gene expression after doxorubicin injection

| Affymetrix ID | Gene symbol   | Gene name                                             | <i>P</i> value | Fold change relative to FA |
|---------------|---------------|-------------------------------------------------------|----------------|----------------------------|
| 10341347      |               |                                                       | 0              | 1.51                       |
| 10343002      |               |                                                       | 0.001          | 0.66                       |
| 10428534      | Trps1         | trichorhinophalangeal syndrome I (human)              | 0.002          | 1.30                       |
| 10341431      |               |                                                       | 0.002          | 1.53                       |
| 10341008      |               |                                                       | 0.003          | 1.62                       |
| 10342631      |               |                                                       | 0.003          | 1.40                       |
| 10339912      |               |                                                       | 0.004          | 1.57                       |
| 10423049      | Prlr          | prolactin receptor                                    | 0.004          | 1.20                       |
| 10341724      |               |                                                       | 0.004          | 1.24                       |
| 10343682      |               |                                                       | 0.004          | 0.74                       |
| 10340000      |               |                                                       | 0.004          | 1.41                       |
| 10342884      |               |                                                       | 0.004          | 1.36                       |
| 10421970      |               |                                                       | 0.004          | 1.47                       |
| 10344580      |               |                                                       | 0.004          | 1.57                       |
| 10341795      |               |                                                       | 0.005          | 1.35                       |
| 10570735      | Defa24        | defensin, alpha, 24                                   | 0.005          | 1.26                       |
| 10409061      | Mirlet7f-1    | microRNA let7f-1                                      | 0.005          | 1.31                       |
| 10342619      |               |                                                       | 0.005          | 1.39                       |
| 10338869      |               |                                                       | 0.005          | 1.40                       |
| 10412481      | 2410127L17Rik | RIKEN cDNA 2410127L17 gene                            | 0.005          | 1.34                       |
| 10343937      |               |                                                       | 0.006          | 0.73                       |
| 10338391      |               |                                                       | 0.006          | 1.38                       |
| 10414460      | Naa30         | N(alpha)-acetyltransferase 30, NatC catalytic subunit | 0.006          | 1.24                       |
| 10339464      |               |                                                       | 0.006          | 1.40                       |
| 10339930      |               |                                                       | 0.006          | 1.51                       |
| 10339488      |               |                                                       | 0.007          | 1.35                       |
| 10343850      |               |                                                       | 0.008          | 1.28                       |
| 10371288      | Gm1553        | predicted gene 1553                                   | 0.008          | 1.36                       |
| 10340350      |               |                                                       | 0.008          | 1.59                       |
| 10338894      |               |                                                       | 0.008          | 1.49                       |
| 10339753      |               |                                                       | 0.008          | 0.67                       |

| Affymetrix ID | Gene symbol   | Gene name                                   | P value | Fold change relative to FA |
|---------------|---------------|---------------------------------------------|---------|----------------------------|
| 10503359      | C430048L16Rik | RIKEN cDNA C430048L16 gene                  | 0.008   | 1.28                       |
| 10344548      |               |                                             | 0.008   | 1.40                       |
| 10338818      |               |                                             | 0.009   | 1.45                       |
| 10343004      |               |                                             | 0.009   | 0.74                       |
| 10340865      |               |                                             | 0.009   | 1.28                       |
| 10484579      | Olfr1051      | olfactory receptor 1051                     | 0.009   | 1.44                       |
| 10339516      |               |                                             | 0.009   | 0.76                       |
| 10473494      | Olfr1034      | olfactory receptor 1034                     | 0.009   | 1.60                       |
| 10343139      |               |                                             | 0.009   | 1.41                       |
| 10338439      |               |                                             | 0.009   | 0.75                       |
| 10404063      | Hist1h2ab     | histone cluster 1, H2ab                     | 0.009   | 1.45                       |
| 10448131      | Vmn2r94       | vomeronasal 2, receptor 94                  | 0.009   | 1.35                       |
| 10342057      |               |                                             | 0.009   | 1.40                       |
| 10341184      |               |                                             | 0.009   | 1.38                       |
| 10339129      |               |                                             | 0.009   | 1.44                       |
| 10401320      | Adam4         | a disintegrin and metallopeptidase domain 4 | 0.009   | 1.31                       |
| 10344432      |               |                                             | 0.01    | 1.44                       |
| 10339122      |               |                                             | 0.01    | 1.44                       |
| 10565385      | Olfr308       | olfactory receptor 308                      | 0.01    | 1.48                       |
| 10372728      | Cdc5l         | cell division cycle 5-like (S. pombe)       | 0.011   | 1.38                       |
| 10340698      |               |                                             | 0.011   | 1.35                       |
| 10374842      | Ccdc88a       | coiled coil domain containing 88A           | 0.011   | 1.14                       |
| 10343058      |               |                                             | 0.011   | 1.31                       |
| 10341149      |               |                                             | 0.011   | 1.51                       |
| 10604053      | Nkrf          | NF-kappaB repressing factor                 | 0.012   | 1.17                       |
| 10338788      |               |                                             | 0.012   | 1.38                       |
| 10503659      | Epha7         | Eph receptor A7                             | 0.012   | 1.23                       |
| 10339429      |               |                                             | 0.012   | 1.54                       |
| 10395612      | G2e3          | G2/M-phase specific E3 ubiquitin ligase     | 0.013   | 1.18                       |
| 10566686      | Olfr490       | olfactory receptor 490                      | 0.013   | 1.35                       |
| 10435501      | Stfa1         | stefin A1                                   | 0.013   | 0.74                       |
| 10344191      |               |                                             | 0.013   | 1.42                       |
| 10343513      |               |                                             | 0.013   | 1.40                       |

| Affymetrix ID | Gene symbol | Gene name | <i>P</i> value | Fold change relative to FA |
|---------------|-------------|-----------|----------------|----------------------------|
| 10341826      |             |           | 0.014          | 0.77                       |
| 10341077      |             |           | 0.014          | 1.34                       |
| 10473596      |             |           | 0.014          | 1.40                       |
| 10342332      |             |           | 0.014          | 0.73                       |

**Table S5** Interaction analysis of sham, doxorubicin (DOXO) and DOXO with folic acid (DOXOFA) on gene expression

| Affymetrix ID | Gene symbol   | Gene name                                   | P value | Log2 mean expression value |       |         | Fold change  |                  |
|---------------|---------------|---------------------------------------------|---------|----------------------------|-------|---------|--------------|------------------|
|               |               |                                             |         | Sham                       | DOXO  | DOXO FA | DOXO vs Sham | DOXO FA vs. DOXO |
| 10566258      |               |                                             | 0       | 10.80                      | 6.72  | 6.81    | 0.06         | 1.06             |
| 10342109      |               |                                             | 0.001   | 6.34                       | 5.51  | 6.09    | 0.56         | 1.49             |
| 10598032      |               |                                             | 0.001   | 11.29                      | 8.65  | 8.71    | 0.16         | 1.04             |
| 10343682      |               |                                             | 0.002   | 5.08                       | 5.47  | 5.04    | 1.31         | 0.74             |
| 10343850      |               |                                             | 0.002   | 5.22                       | 4.82  | 5.19    | 0.76         | 1.29             |
| 10341476      |               |                                             | 0.002   | 4.24                       | 4.81  | 4.39    | 1.49         | 0.75             |
| 10421970      |               |                                             | 0.002   | 6.93                       | 6.44  | 7.00    | 0.71         | 1.47             |
| 10342631      |               |                                             | 0.003   | 5.75                       | 5.37  | 5.87    | 0.77         | 1.41             |
| 10341347      |               |                                             | 0.003   | 5.76                       | 5.56  | 6.15    | 0.87         | 1.50             |
| 10343002      |               |                                             | 0.003   | 3.92                       | 4.26  | 3.67    | 1.27         | 0.66             |
| 10412481      | 2410127L17Rik | RIKEN cDNA 2410127L17 gene                  | 0.003   | 5.80                       | 5.44  | 5.87    | 0.78         | 1.34             |
| 10341008      |               |                                             | 0.003   | 5.89                       | 5.41  | 6.10    | 0.72         | 1.62             |
| 10401320      | Adam4         | a disintegrin and metallopeptidase domain 4 | 0.003   | 6.61                       | 6.22  | 6.61    | 0.76         | 1.31             |
| 10574023      | Mt2           | metallothionein 2                           | 0.003   | 8.20                       | 11.55 | 11.03   | 10.13        | 0.70             |
| 10341431      |               |                                             | 0.004   | 6.52                       | 6.17  | 6.77    | 0.78         | 1.52             |
| 10338788      |               |                                             | 0.004   | 6.45                       | 5.99  | 6.45    | 0.73         | 1.38             |
| 10342849      |               |                                             | 0.004   | 6.01                       | 6.50  | 6.36    | 1.40         | 0.91             |
| 10341795      |               |                                             | 0.004   | 6.07                       | 5.76  | 6.19    | 0.81         | 1.35             |
| 10342778      |               |                                             | 0.004   | 4.21                       | 4.63  | 4.23    | 1.34         | 0.75             |
| 10342788      |               |                                             | 0.005   | 4.12                       | 4.62  | 4.42    | 1.42         | 0.87             |
| 10338145      |               |                                             | 0.005   | 6.41                       | 5.95  | 6.27    | 0.73         | 1.25             |
| 10339075      |               |                                             | 0.005   | 6.73                       | 6.25  | 6.63    | 0.72         | 1.30             |
| 10589535      | Ngp           | neutrophilic granule protein                | 0.005   | 5.68                       | 6.68  | 5.99    | 2.00         | 0.62             |
| 10341149      |               |                                             | 0.006   | 4.81                       | 4.29  | 4.88    | 0.70         | 1.50             |
| 10435501      | Stfa1         | stefin A1                                   | 0.006   | 6.55                       | 6.94  | 6.52    | 1.31         | 0.74             |
| 10563597      | Saa3          | serum amyloid A 3                           | 0.006   | 6.25                       | 7.13  | 6.54    | 1.83         | 0.66             |
| 10379953      | 4632419I22Rik | RIKEN cDNA 4632419I22 gene                  | 0.006   | 6.50                       | 6.21  | 6.42    | 0.82         | 1.16             |
| 10503359      | C430048L16Rik | RIKEN cDNA C430048L16 gene                  | 0.006   | 6.90                       | 6.62  | 6.98    | 0.82         | 1.29             |
| 10342597      |               |                                             | 0.006   | 6.11                       | 5.76  | 6.11    | 0.79         | 1.28             |
| 10435497      | Stfa2l1       | stefin A2 like 1                            | 0.006   | 5.55                       | 6.53  | 5.99    | 1.97         | 0.69             |
| 10341184      |               |                                             | 0.007   | 6.40                       | 6.03  | 6.49    | 0.78         | 1.38             |

|          |               |                                                     |       |      |      |      |      |      |
|----------|---------------|-----------------------------------------------------|-------|------|------|------|------|------|
| 10338338 |               |                                                     | 0.007 | 4.68 | 5.11 | 4.83 | 1.34 | 0.82 |
| 10338869 |               |                                                     | 0.007 | 6.81 | 6.51 | 7.00 | 0.81 | 1.41 |
| 10433885 | Cebpd         | CCAAT/enhancer binding protein (C/EBP), delta       | 0.008 | 6.35 | 6.90 | 6.53 | 1.47 | 0.77 |
| 10555736 | Olfr558       | olfactory receptor 558                              | 0.008 | 7.19 | 6.73 | 7.06 | 0.73 | 1.25 |
| 10466130 | Ms4a8a        | membrane-spanning 4-domains, subfamily A, member 8A | 0.008 | 6.43 | 6.85 | 6.53 | 1.33 | 0.80 |
| 10566254 | Hbb-b1        | hemoglobin, beta adult major chain                  | 0.009 | 6.74 | 5.36 | 5.37 | 0.38 | 1.01 |
| 10338444 |               |                                                     | 0.009 | 4.29 | 4.96 | 4.39 | 1.59 | 0.68 |
| 10338345 |               |                                                     | 0.009 | 6.51 | 5.99 | 6.30 | 0.70 | 1.24 |
| 10502335 | Bank1         | B-cell scaffold protein with ankyrin repeats 1      | 0.009 | 6.44 | 6.07 | 6.32 | 0.78 | 1.19 |
| 10339122 |               |                                                     | 0.01  | 5.01 | 4.64 | 5.18 | 0.77 | 1.45 |
| 10341168 |               |                                                     | 0.01  | 6.72 | 6.45 | 6.77 | 0.83 | 1.25 |
| 10343068 |               |                                                     | 0.01  | 6.56 | 6.07 | 6.37 | 0.71 | 1.23 |
| 10338629 |               |                                                     | 0.01  | 6.71 | 7.03 | 6.72 | 1.24 | 0.81 |
| 10399973 | Hdac9         | histone deacetylase 9                               | 0.01  | 7.71 | 7.48 | 7.74 | 0.85 | 1.20 |
| 10344143 |               |                                                     | 0.01  | 6.19 | 5.81 | 6.23 | 0.77 | 1.34 |
| 10399632 | F630048H11Rik | RIKEN cDNA F630048H11 gene                          | 0.01  | 5.81 | 5.52 | 5.80 | 0.82 | 1.22 |
| 10340350 |               |                                                     | 0.01  | 5.47 | 5.05 | 5.72 | 0.75 | 1.59 |
| 10428534 | Trps1         | trichorhinophalangeal syndrome I (human)            | 0.011 | 6.54 | 6.41 | 6.79 | 0.91 | 1.30 |
| 10513420 | Mup7          | major urinary protein 7                             | 0.011 | 4.19 | 4.64 | 4.21 | 1.36 | 0.74 |
| 10340561 |               |                                                     | 0.011 | 5.01 | 4.51 | 4.97 | 0.71 | 1.37 |
| 10338752 |               |                                                     | 0.011 | 4.98 | 4.58 | 5.05 | 0.76 | 1.39 |
| 10339168 |               |                                                     | 0.011 | 6.50 | 6.18 | 6.52 | 0.80 | 1.26 |
| 10417561 | Fam107a       | family with sequence similarity 107, member A       | 0.012 | 6.50 | 6.90 | 6.57 | 1.32 | 0.80 |
| 10604877 | Mir465        | microRNA 465                                        | 0.012 | 4.29 | 4.75 | 4.69 | 1.37 | 0.96 |
| 10341250 |               |                                                     | 0.012 | 7.38 | 6.91 | 7.21 | 0.72 | 1.23 |
| 10339921 |               |                                                     | 0.012 | 6.73 | 6.32 | 6.67 | 0.75 | 1.27 |
| 10375608 | Scgb3a1       | secretoglobin, family 3A, member 1                  | 0.013 | 6.63 | 7.25 | 6.86 | 1.53 | 0.77 |
| 10343937 |               |                                                     | 0.013 | 5.56 | 5.79 | 5.33 | 1.17 | 0.73 |
| 10605820 | Zc4h2         | zinc finger, C4H2 domain containing                 | 0.013 | 6.50 | 6.32 | 6.52 | 0.88 | 1.15 |
| 10339488 |               |                                                     | 0.013 | 5.76 | 5.53 | 5.96 | 0.85 | 1.35 |
| 10439296 | Stfa2         | stefin A2                                           | 0.013 | 5.35 | 6.01 | 5.57 | 1.58 | 0.74 |
| 10542164 | Clec12a       | C-type lectin domain family 12, member a            | 0.013 | 7.03 | 6.43 | 6.68 | 0.66 | 1.18 |
| 10341724 |               |                                                     | 0.013 | 6.76 | 6.63 | 6.94 | 0.92 | 1.24 |
| 10342313 |               |                                                     | 0.013 | 6.65 | 6.24 | 6.53 | 0.75 | 1.23 |
| 10344341 |               |                                                     | 0.014 | 6.51 | 6.18 | 6.58 | 0.80 | 1.31 |
| 10366737 |               |                                                     | 0.014 | 7.08 | 7.33 | 7.09 | 1.19 | 0.85 |
| 10375811 |               |                                                     | 0.014 | 6.61 | 6.40 | 6.67 | 0.86 | 1.21 |

|          |       |                                       |       |      |      |      |      |      |
|----------|-------|---------------------------------------|-------|------|------|------|------|------|
| 10338721 |       |                                       | 0.014 | 4.61 | 4.21 | 4.66 | 0.76 | 1.36 |
| 10372728 | Cdc5l | cell division cycle 5-like (S. pombe) | 0.014 | 8.51 | 8.22 | 8.69 | 0.82 | 1.38 |
| 10530465 |       |                                       | 0.014 | 4.35 | 4.70 | 4.34 | 1.28 | 0.78 |
